# Supplementary material for: CircCDC42-encoded CDC42-165aa regulates macrophage pyroptosis in Klebsiella pneumoniae infection through Pyrin inflammasome activation
Source: PubMed Central journal article supplement (PMC11231140; doi:10.1038/s41467-024-50154-x), 2024-07-08
Supplement: 41467_2024_50154_MOESM1_ESM.pdf [file 41467_2024_50154_MOESM1_ESM.pdf]

Supplementary Materials for

**CircCDC42 encoded CDC42-165aa regulates macrophage pyroptosis in *Klebsiella pneumoniae* infection through pyrin inflammasome activation**

Authors: Nana Xu<sup>1,2,#</sup>, Jiebang Jiang<sup>1,#</sup>, Fei Jiang<sup>1,3</sup>, Guokai Dong<sup>1,2</sup>, Li Meng<sup>1,2</sup>, Meng Wang<sup>1,2</sup>, Jing Chen<sup>1</sup>, Cong Li<sup>4</sup>, Yongping Shi<sup>1\*</sup>, Sisi He<sup>5,\*</sup>, Rongpeng Li<sup>1\*</sup>

**Affiliations:**

<sup>1</sup> Jiangsu Province Engineering Research Center of Cardiovascular Drugs Targeting Endothelial Cells, School of Life Sciences, Jiangsu Normal University, Xuzhou 221116, China;

<sup>2</sup> Laboratory of Morphology, Xuzhou Medical University, Xuzhou 221004, China;

<sup>3</sup> Department of Laboratory Medicine, the Affiliated Hospital of Xuzhou Medical University, Xuzhou 221002, China

<sup>4</sup> Xuzhou Key Laboratory of Emergency Medicine, the Affiliated Hospital of Xuzhou Medical University, Xuzhou 221002, China

<sup>5</sup> Department of Oncology, The Second Affiliated Hospital of Zunyi Medical University, Zunyi, China

<sup>#</sup>These authors contributed equally.

\* Correspondence: [lirongpeng@jsnu.edu.cn](mailto:lirongpeng@jsnu.edu.cn) (R. Li), [sisihe1219@163.com](mailto:sisihe1219@163.com) (S. He) or [shiyongp@sina.com](mailto:shiyongp@sina.com) (Y. Shi)

**This PDF file includes:**

**Supplementary Figure 1 to 7**

**Supplementary Table 1. Key Resources**

**Supplementary Table 2. The list of primer sequences used in the study**

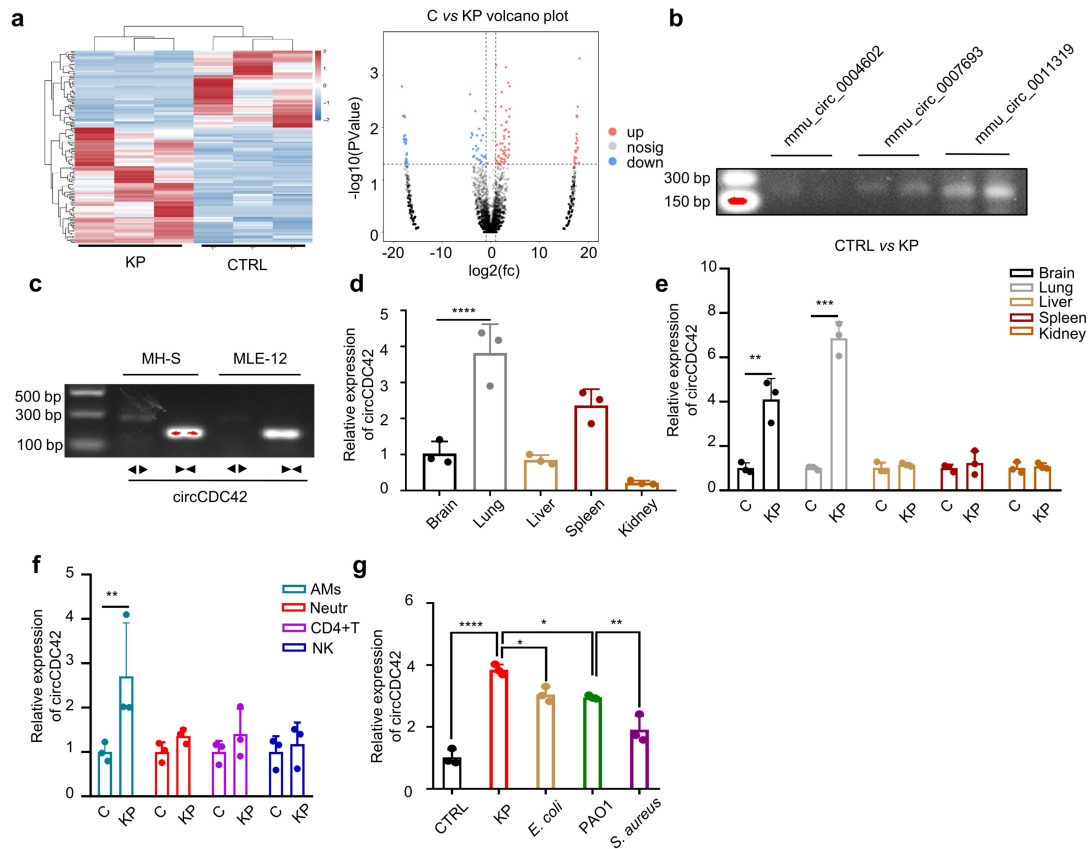

### Supplementary Figure 1. CircRNAs screening in vivo and in vitro after KP infection (Related to Figure 1)

**a** A total of 3 pairs of MH-S cell infected with or without KP (MOI of 20:1) were subjected to RNA sequencing (RNA-seq). Heatmap and volcano plot for microarray analysis of differentially expressed circRNAs in MH-S cells. **b** MH-S cells were infected with KP at an MOI of 20:1 for 4 h. cDNAs from MH-S were used as templates to amplify circRNAs using divergent primers. Related to Figure 1b (n = 3 biological replicates). **c** PCR products using circCDC42 divergent primers from MH-S and MLE-12 were analyzed by agarose gel electrophoresis (n = 3 biological replicates). **d** Expression levels of circCDC42 in the different tissues from C57BL/6J mice were examined by RT-qPCR (n = 3 biological replicates). **e** C57BL/6J mice were challenged intranasally with  $5 \times 10^6$  colony forming units (CFU) of KP. Expression levels of circCDC42 in mice were examined by RT-qPCR (n = 3 biological replicates). **f** Expression levels of circCDC42 in the different cells were examined by RT-qPCR upon KP infection (n = 3 biological replicates). **g** Expression

levels of circCDC42 in mouse lungs were examined by RT-qPCR upon indicated pathogen ( $5 \times 10^6$  CFU) infection (n = 3 biological replicates). Data are shown as means  $\pm$  SD. **d, g** One-way ANOVA with Tukey test. **e, f** Two-way ANOVA with Bonferroni's test. \* $p < 0.05$ , \*\* $p < 0.01$ , \*\*\* $p < 0.001$ , \*\*\*\* $p < 0.0001$ .

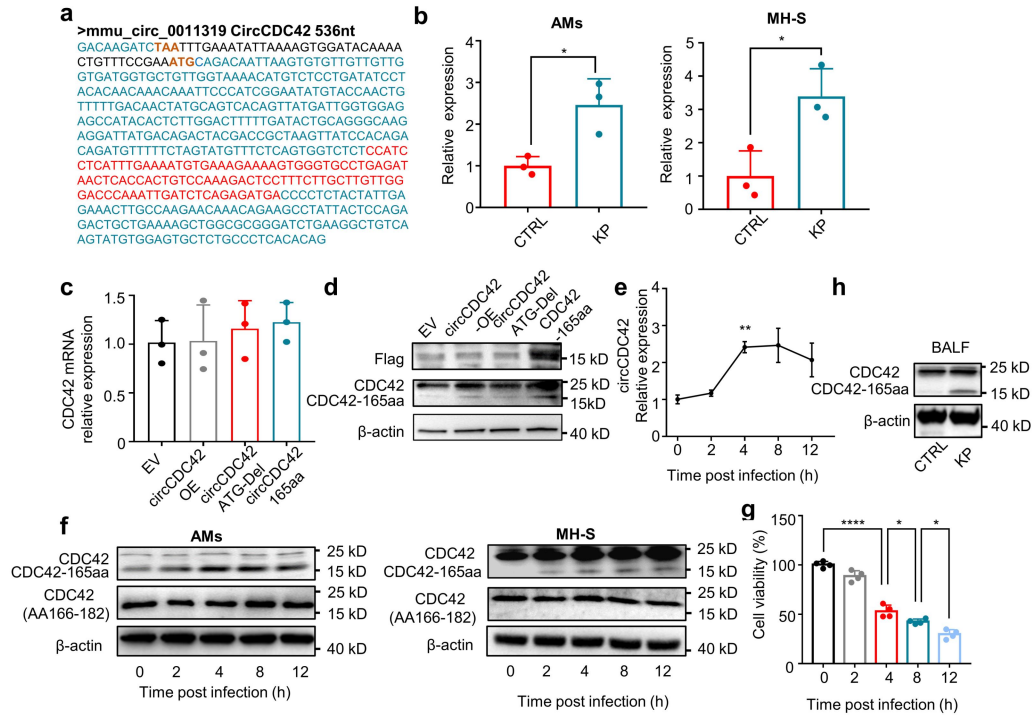

## Supplementary Figure 2. Identification the unique CDC42-165aa sequence in circCDC42 (Related to Figure 2)

**a** The sequences of the putative ORF and IRES (red) are shown. Related to Figure 2a. **b** Primary AMs and MH-S cells were infected with KP at an MOI of 20 : 1 for 4 h. Relative expression of CDC42-165aa expression in AMs (left panel) and MH-S (right panel) as in Figure 2d (n = 3 biological replicates). **c** MH-S cells were treated with circCDC42 ATG delete plasmid, circCDC42 or CDC42-165aa plasmid. The linear CDC42 mRNA level was detected by RT-qPCR (n = 3 biological replicates). **d** Expression of CDC42-165aa-Flag and CDC42-165aa in the indicated MH-S were detected by immunoblotting (n = 3 biological replicates). **e** MH-S cells were infected with KP at an MOI of 20 : 1, and the level of circCDC42 was detected by RT-qPCR at the indicated time points (n = 3 biological replicates). **f** Primary AMs (left panel) and MH-S cells (right panel) were infected with KP at an MOI of 20 : 1. Expression of CDC42 and CDC42-165aa proteins in cells for indicated time point were detected by immunoblotting using CDC42 antibody (Affinity, DF6322, AA51-74) or CDC42 antibody (Santa Cruz, SC-8401, AA166-182) (n = 3 biological replicates). **g** MH-S cells were infected with KP at an MOI of 20 : 1 for indicated time point, and cell viability was measured by MTT assay (n = 4 biological replicates). **h**

C57BL/6J mice were challenged intranasally with  $5 \times 10^6$  CFU of KP for 24 h. Expression levels of CDC42-165aa in AMs isolated from BALF of mice with KP infection for 24 h were examined by immunoblotting (n = 3 biological replicates). Data are shown as means  $\pm$  SD. **b** Unpaired two-tailed t-test. **c, e, g** One-way ANOVA with Tukey test. \* $p < 0.05$ , \*\* $p < 0.01$ , \*\*\* $p < 0.001$ , \*\*\*\* $p < 0.0001$ .

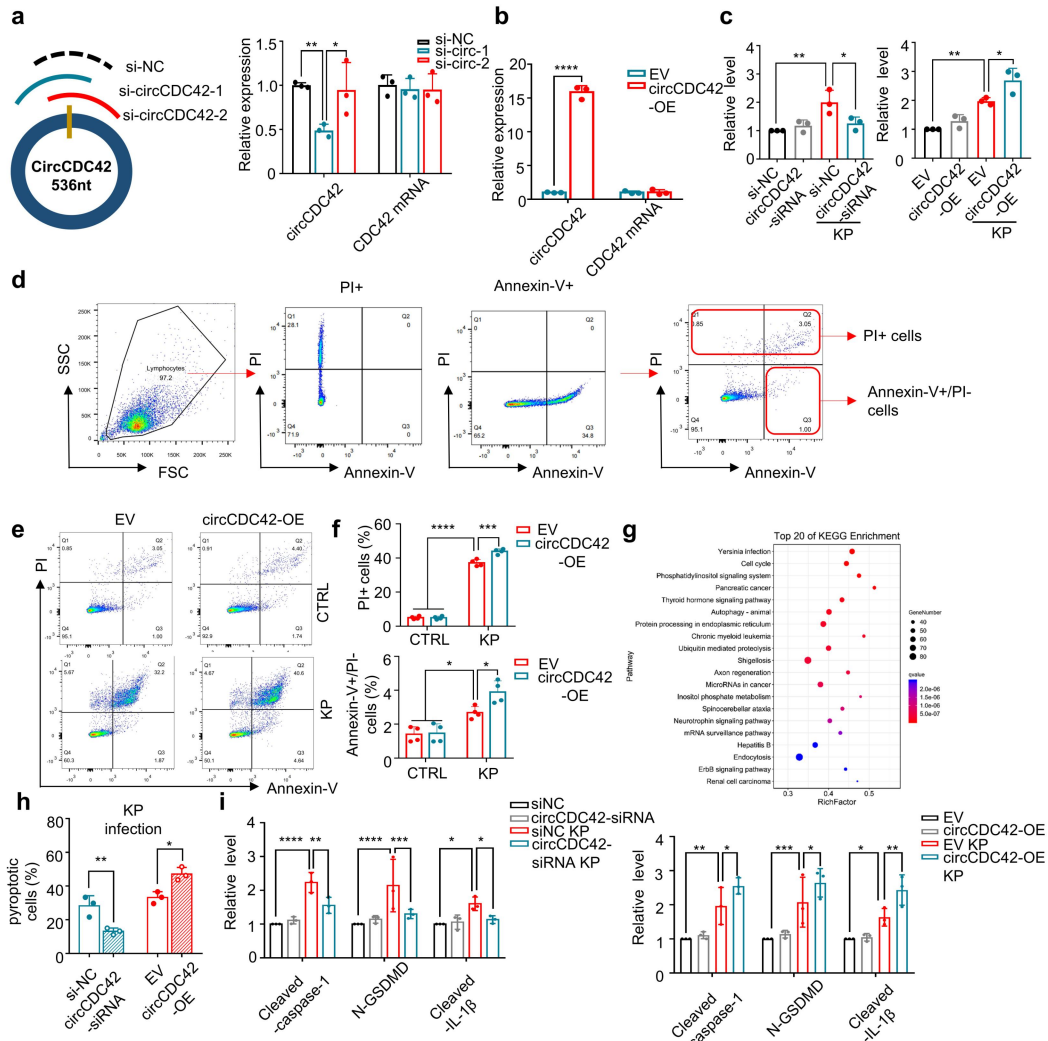

**Supplementary Figure 3. Related to Figure 3.**

**a** Left, illustration of the circCDC42 junction-specific FISH probe and circCDC42 siRNA target site. Right, MH-S cells were transfected with siNC or circCDC42 siRNA, circCDC42 and linear CDC42 mRNA level were detected by RT-qPCR (n = 3 biological replicates). **b** MH-S cells were transfected with empty vector (EV) or circCDC42 overexpression (OE) plasmid, respectively for 24 h. circCDC42 and linear CDC42 mRNA level were detected by RT-qPCR (n = 3 biological replicates). **c** The indicated MH-S cell swere infected with KP at an MOI of 20:1 for 4 h. Relative amounts of CDC42-165aa expression in MH-S cells treated as

in Figure 3a (n = 3 biological replicates). **d** Annexin-FITC and PI staining of MH-S cells. The gating strategy for the MH-S cells (Annexin V<sup>+</sup>PI<sup>-</sup> cells and PI<sup>+</sup> cells). **e** Annexin-FITC and PI staining of MH-S cells subjected to KP infection with or without overexpression (OE) plasmid treatment. Representative FACS plots are shown (n = 3 biological replicates). **f** A summary of the percentage of Annexin V<sup>+</sup>PI<sup>-</sup> cells and PI<sup>+</sup> cells among dead cells as in Supplementary Figure 3d (n = 3 biological replicates). **g** Enrichment of differentially expressed genes in different pathways by KEGG analysis. **h** MH-S cells were transfected with EV or circCDC42-OE plasmids, respectively for 24 h, then infected with KP at an MOI of 20:1 for 4 h. The percentage of pyroptotic cells in Figure 3d was calculated (n = 3 biological replicates). **i** MH-S cells were transfected with siNC or circCDC42 siRNA, EV or circCDC42-OE plasmid, respectively for 24 h. The cells were then infected with KP at an MOI of 20:1 for 4 h. Relative level of Cleaved-Caspase-1, N-GSDMD and Cleaved-IL-1 $\beta$  in MH-S cells treated as indicated in Figure 3f (n = 3 biological replicates). Data are shown as means  $\pm$  SD. **a, b, c, f, h, i** Two-way ANOVA with Bonferroni's test. \* $p$  < 0.05; \*\* $p$  < 0.01; \*\*\* $p$  < 0.001; \*\*\*\* $p$  < 0.0001.

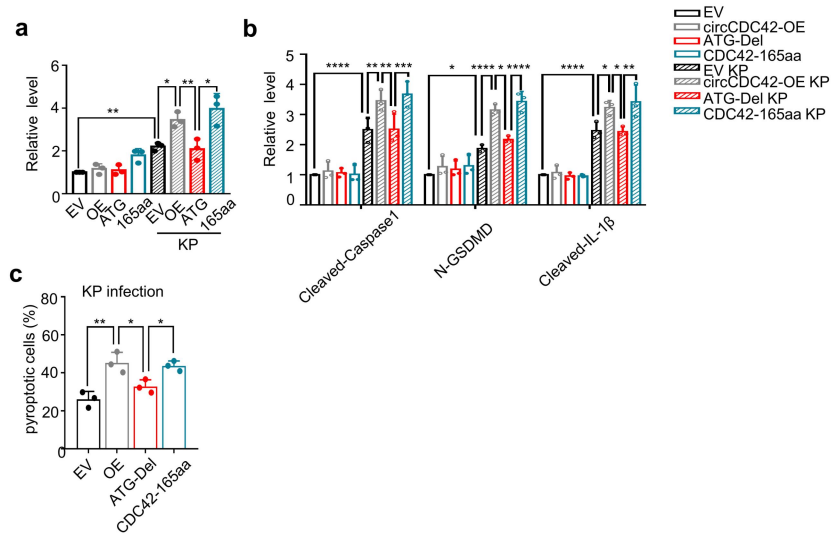

**Supplementary Figure 4. Related to Figure 4** MH-S cells were transfected with EV, circCDC42-OE plasmid, circCDC42 ATG-Del plasmid, or CDC42-165aa plasmid, respectively for 24 h. **a** Relative level of CDC42-165aa expression in MH-S cells treated as indicated in Figure 4a (n = 3 biological replicates). **b** The percentage of pyroptotic cells in Figure 4c was calculated (n = 3 biological replicates). **c** Relative level of cleaved-Caspase-1, N-GSDMD and cleaved-IL-1 $\beta$  in MH-S cells treated as indicated in Figure 4e (n = 3 biological replicates). Data are shown as means  $\pm$  SD. **a**, **c** Two-way ANOVA with Bonferroni's test. **b** One-way ANOVA with Tukey test. \* $p$  < 0.05; \*\* $p$  < 0.01; \*\*\* $p$  < 0.001; \*\*\*\* $p$  < 0.0001.



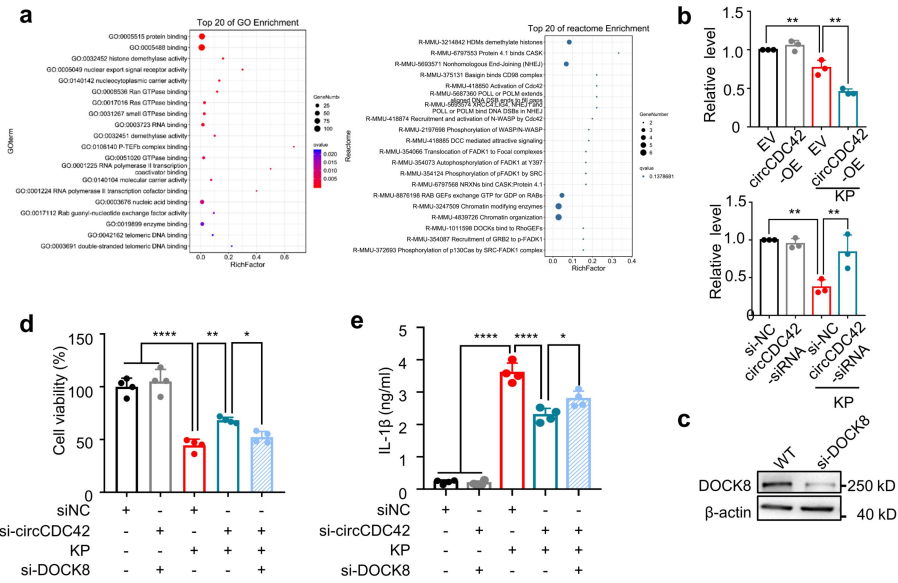

### Supplementary Figure 5. Related to Figure 5

**a** A total of 3 pairs of MH-S cell samples infected with or without KP (MOI of 20 : 1) were subjected to RNA sequencing (RNA-seq). Enrichment of differentially expressed genes by Reactome and GO analysis. **b** MH-S cells were transfected with empty EV, circCDC42-OE plasmid, circCDC42 ATG-Del plasmid, or CDC42-165aa plasmid, respectively for 24 h. Cells were then infected with KP at an MOI of 20 : 1 for 4 h. Relative level of activated GTPases CDC42 in MH-S cells treated as indicated in Figure 5e (n = 3 biological replicates). **c** MH-S cells were treated with or without DOCK8 siRNA for 24 h. DOCK8 levels in MH-S cells were detected by western blotting (n = 3 biological replicates). **d** The indicated MH-S cells were infected with or without KP (MOI of 20 : 1) for 4 h, and cell viability was measured by MTT assay (n = 4 biological replicates). **e** The secretion of IL-1β in cell supernatant after KP infection (MOI of 20 : 1) for 4 h was detected by ELISA (n = 4 biological replicates). Data are shown as means ± SD. **b, d, e** One-way ANOVA with Tukey test. \**p* < 0.05; \*\**p* < 0.01; \*\*\**p* < 0.001; \*\*\*\**p* < 0.0001.

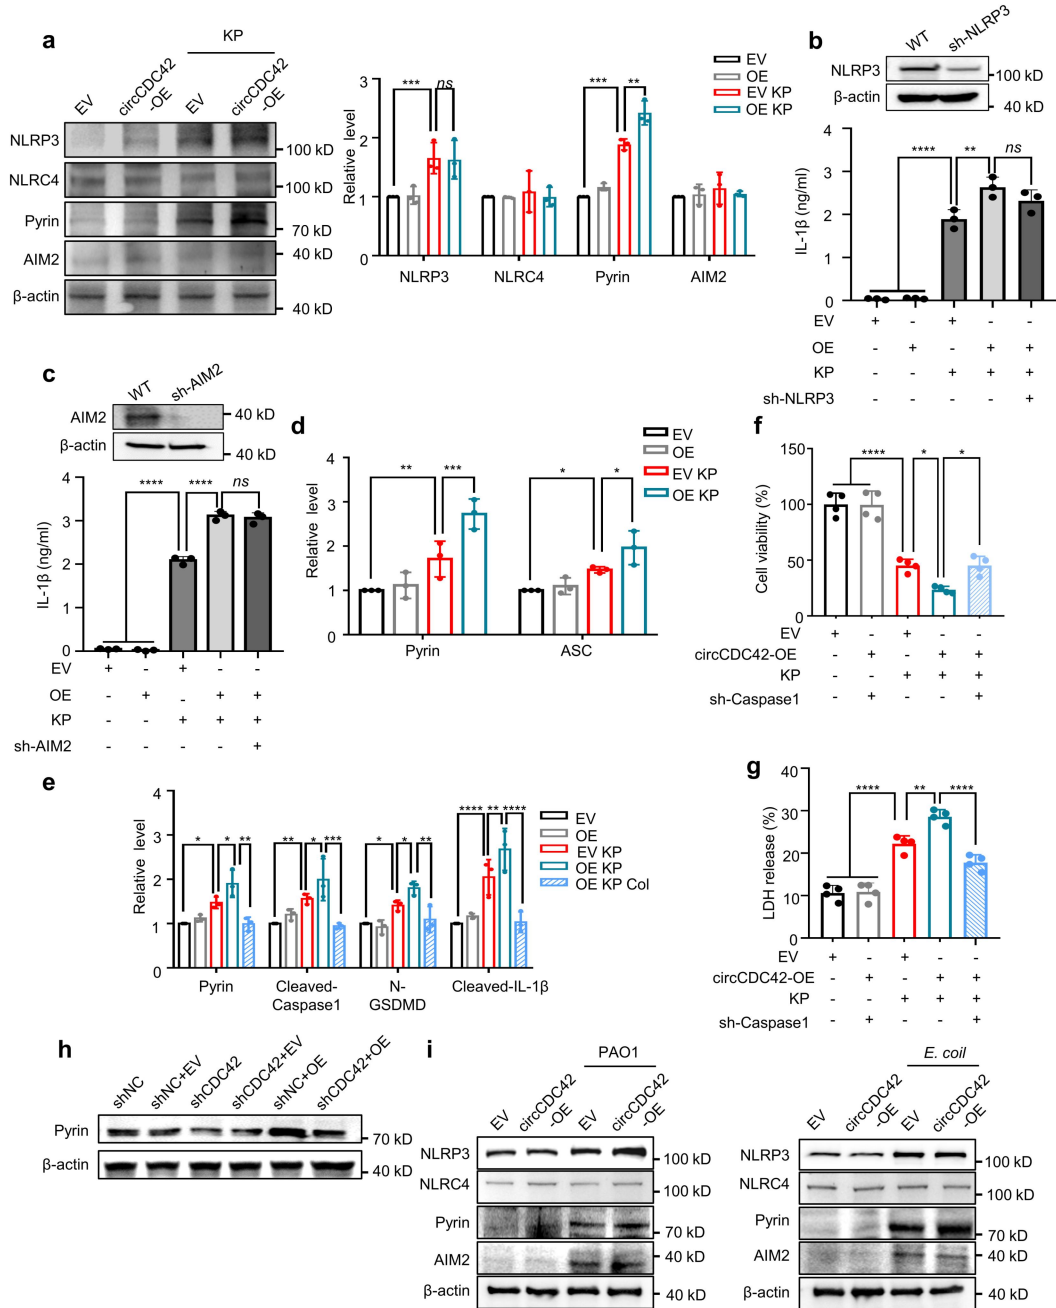

### Supplementary Figure 6. Related to Figure 6

**a** MH-S cells were transfected with EV or circCDC42-OE plasmid, respectively for 24 h, then infected with KP at an MOI of 20 : 1 for 4 h. Left, expression of NLRP3, NLRC4, Pypin, and AIM2 in MH-S cells were detected by immunoblotting. Right, relative levels were quantified by ImageJ (n = 3 biological replicates). **b** MH-S cells were treated with EV, circCDC42 -OE plasmid, or NLRP3 shRNA as indicated for 24

h, then infected with KP (MOI of 20 : 1, 4 h) or not. Western Blotting showing NLRP3 expression in MH-S cells. The secretion of IL-1 $\beta$  in cell supernatant was detected by ELISA (n = 3 biological replicates). **c** MH-S cells were treated with EV, circCDC42 -OE plasmid, or AIM2 shRNA as indicated for 24 h, then infected with KP (MOI of 20:1, 4 h) or not. AIM2 level in MH-S cells was detected by western blotting. The secretion of IL-1 $\beta$  in cell supernatant was detected by ELISA (n = 3 biological replicates). **d** The expression level of Pyrin bound to ASC was assessed using optical density and presented as fold change to EV group, as shown in Figure 6a (n = 3 biological replicates). **e** Relative level of Pyrin, cleaved-Caspase-1, N-GSDMD, and cleaved-IL-1 $\beta$  in MH-S cells treated as indicated, shown as in Figure 6e (n = 3 biological replicates). **f** MH-S cells were treated with EV, circCDC42 -OE plasmid, or Caspase-1 shRNA for 24 h, then infected with or without KP (MOI of 20 : 1) for 4 h. The cell viability was measured by MTT assay (n = 5 biological replicates). **g** LDH release was measured from MH-S cells infected with or without KP (MOI of 20:1) for 4 h , and presented as percent of medium activity compared to cell lysate from cells (n = 4 biological replicates). **h** MH-S cells were treated with EV, circCDC42 -OE plasmid, or CDC42 shRNA as indicated for 24 h, then infected with KP (MOI of 20:1) for 4 h. Pyrin level in MH-S cells was detected by western blotting. (n = 3 biological replicates). **i** Protein expression of NLRP3, NLRC4, Pyin, and AIM2 in MH-S cells transfected with indicated plasmid with PAO1 or *E. coli* infection (MOI of 20 : 1) for 4 h or not (n = 3 biological replicates). Data are shown as means  $\pm$  SD. **a, d, e** Two-way ANOVA with Bonferroni's test. **b, f, g** One-way ANOVA with Tukey test. \**p*

< 0.05; \*\* $p$  < 0.01; \*\*\* $p$  < 0.001; \*\*\*\* $p$  < 0.0001, *ns* no significant difference.

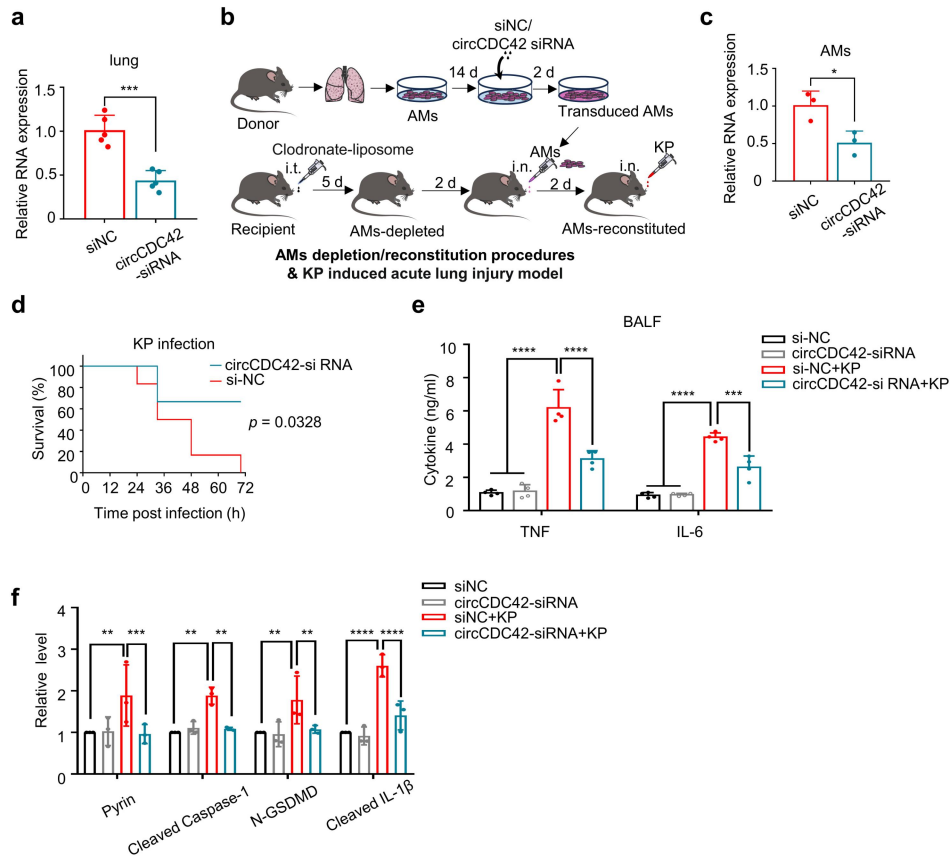

### Supplementary Figure 7. Related to Figure 7

**a** Mouses model of KP infection was established as Figure 7a shown. RT-qPCR analysis of circCDC42 expression in lungs from KP-infected siNC- and circCDC42-siRNA- injected mice ( $n = 5$ ). **b** AMs depletion/reconstitution procedures and KP induced acute lung injury model. **c** RT-qPCR analysis of circCDC42 expression in AMs from BLAF in Figure S7b mice ( $n = 3$  biological replicates). **d** Kaplan-Meier survival curves of KP-infected siNC- and circCDC42 siRNA-AMs Recipient mice ( $n = 6$ ). Survival was determined up to 72 h ( $p = 0.0328$ ). **e** Expression levels of TNF and IL-6 in BALF from KP-infected siNC- and circCDC42 siRNA-AMs Recipient mice were determined by ELISA ( $n = 4$  biological replicates). **f** Relative level of Pyrin, cleaved-Caspase-1, N-GSDMD, and cleaved-IL-1 $\beta$  in AMs

from KP-infected siNC- and circCDC42 siRNA-AMs Recipient mice, as shown in Figure 7h (n = 3 biological replicates). Data are shown as means  $\pm$  SD. **a, c** Unpaired two-tailed t-test. Log-rank (Mantel-Cox) test. **e, f** Two-way ANOVA with Bonferroni's test. \* $p < 0.05$ ; \*\* $p < 0.01$ ; \*\*\* $p < 0.001$ ; \*\*\*\* $p < 0.0001$ .

**Supplementary Table 1. Key Resources**

| REAGENT or RESOURCE                                             | SOURCE                    | IDENTIFIER  |
|-----------------------------------------------------------------|---------------------------|-------------|
| <b>Antibodies</b>                                               |                           |             |
| Caspase-1 (E2Z1C) Rabbit mAb (1:1000)                           | Cell Signaling Technology | #24232      |
| Cleaved Gasdermin D (Gly277) Antibody (1:1000)                  | Cell Signaling Technology | #34667      |
| NLRP3 (D4D8T) Rabbit mAb (1:1000)                               | Cell Signaling Technology | #15101;     |
| IL-1 $\beta$ (3A6) Mouse mAb (1:1000)                           | abcam                     | #ab234437   |
| ASC/TMS1/PYCARD Antibody (B-3) (1:1000)                         | Santa Cruz                | #sc-514414  |
| Anti-Pyrin antibody (1:1000)                                    | abcam                     | #ab195975   |
| AIM2 Polyclonal antibody (1:1000)                               | Proteintech               | #20590-1-AP |
| DOCK8 Polyclonal antibody (1:1000)                              | Proteintech               | #11622-1-AP |
| Beta Actin Monoclonal antibody (1:5000)                         | Proteintech               | #66009-1-Ig |
| Cdc42 Antibody (B-8) (166-182aa) (1:1000)                       | Santa Cruz                | #sc-8401    |
| m-IgG3 BP-HRP (1:1000)                                          | Santa Cruz                | #sc-533670  |
| CDC42 Rabbit Polyclonal Antibody (1:1000)                       | Affinity Biosciences      | #DF6322     |
| ANTI-FLAG mouse Monoclonal antibody mouse (1:1000)              | Sigma-Aldrich             | #F1804-50UG |
| NLRC4 Rabbit pAb (A7382) (1:1000)                               | ABclonal                  | #A7382      |
| CoraLite488-conjugated Goat Anti-Mouse IgG(H+L) (IF 1:100)      | Proteintech               | #SA00013-1  |
| CoraLite594-conjugated Goat Anti-Rabbit IgG(H+L) (IF 1:100)     | Proteintech               | #SA00013-4  |
| HRP-conjugated Affinipure Goat Anti-Mouse IgG(H+L) (WB 1:5000)  | Proteintech               | #SA00001-1  |
| HRP-conjugated Affinipure Goat Anti-Rabbit IgG(H+L) (WB 1:5000) | Proteintech               | #SA00001-2  |
| CD170 (Siglec F) mAb (IF 1:100)                                 | Thermo Fisher Scientific  | #14-1702-82 |
| <b>Critical Commercial Assays</b>                               |                           |             |
| Mouse TNF-alpha ELISA Kit                                       | Proteintech               | #KE10002    |
| Mouse IL-6 ELISA Kit                                            | Proteintech               | #KE10007    |
| Enhanced BCA Protein Assay Kit                                  | Beyotime                  | #P0010      |
| Lacate Dehydrogenase(LDH) Activity Assay Kit                    | Solarbio                  | #BC0685     |
| Ultra-High Sensitivity ECL Kit                                  | MCE                       | #HY-K1005   |
| Cdc42 Pull-down Activation Assay                                | Cytoskeleton              | # BK034     |
| The Dual-Luciferase Reporter Assay System                       | Promega                   | #E1910      |

**Supplementary Table 2. The list of primer sequences used in the study**

| Name                                         | Sequence (5' to 3')             |
|----------------------------------------------|---------------------------------|
| <b><i>For quantitative real-time PCR</i></b> |                                 |
| circCDC42-F (divergent)                      | ATGTGGAGTGCTCTGCCCTC            |
| circCDC42-R(divergent)                       | TCCTCTTGCCCTGCAGTATCAA          |
| circCDC42-F (convergent)                     | GGATTATGACAGACTACGACCGCTAAG     |
| circCDC42 -R(convergent)                     | GGCAGAGCACTCCACATACTTGAC        |
| circRanbp9-F                                 | ACCCGGCAAAAGCAGCACTG            |
| circRanbp9-R                                 | AAGCGGTCTATCTGGGCCTG            |
| circSgms1-F                                  | TGGGCGTTTTCTATTTGCGA            |
| circSgms1-R                                  | ACACTATCCCTCCTTGGCTG            |
| IL-6-F                                       | TTCTTGGGACTGATGCTGGT            |
| IL-6-R                                       | CTGTGAAGTCTCCTCTCCGG            |
| TNF-F                                        | TCAGGCGATCTTCCCATCTC            |
| TNF-R                                        | AAGTGGGATGGTTGGTAGGG            |
| IL-1 $\beta$ -F                              | CGTTCCCATTAGACAGCTGC            |
| IL-1 $\beta$ -R                              | TCAGCTCATATGGGTCCGAC            |
| GAPDH-F (divergent)                          | GCTGAGTATGTCGTGGAGTCT           |
| GAPDH-R (divergent)                          | GGCAGCCCTGGTGACCAGGCGC          |
| GAPDH-F (convergent)                         | GAGCGAGACCCCACTAACAT            |
| GAPDH-R (convergent)                         | CCCTTCCACAATGCCAAAGTT           |
| U6-F                                         | TGCTCGCTTCGGCAGCACAT            |
| U6-R                                         | CTTGCGCAGGGGCCATGCTA            |
| <b><i>Oligonucleotides for FISH</i></b>      |                                 |
| circCDC42 FISH                               | Cy3-AGATCTTGTCTGTGTGAGGGCAG-Cy3 |
| <b><i>For SiRNA/SHRNA sequences</i></b>      |                                 |
| circCDC42-siRNA-1                            | AUCUUGUCCUGUGUGAGGGCATT         |
| circCDC42-siRNA-2                            | AAUUAGAUCUUGUCCUGUGUGTT         |
| si NC                                        | UUCUCCGAACGUGUCACGUTT           |
| si-Dock8                                     | GGCTTGTACGAGACGGTTAAT           |
| sh-AIM2                                      | TCCCAGGATTAGTAAACTGAA           |
| sh-Caspase1                                  | CCATGTTGGATCAGATCAACT           |
| sh-NLRC4                                     | CAGAAATTGAAGCCCTGATAA           |
| sh-NC                                        | CCCGAACGGCACGTT                 |
